# Supplementary material for: Rationalizing the carborane versus phenyl-driven luminescence in related dicarboxylic ligands and their antenna effect for their Eu3+ and Tb3+ metal–organic frameworks: a combined experimental and computational study
Source: Royal Society of Chemistry journal article supplement (doi:10.1039/d3tc04018f), 2024-01-01
Supplement: d3tc04018f1.pdf [file d3tc04018f1.pdf]

## Supporting Information for

# Rationalizing the carborane *versus* phenyl-driven luminescence in related dicarboxylic ligands and their antenna effect for their Eu<sup>3+</sup> and Tb<sup>3+</sup> metal-organic frameworks: A combined experimental and computational study

Zhen Li,<sup>a,b</sup> Claudio Roscini,<sup>c</sup> Rosario Núñez,<sup>a</sup> Francesc Teixidor,<sup>a</sup> Clara Viñas,<sup>a</sup> Eliseo Ruiz,<sup>d\*</sup> José Giner Planas<sup>a\*</sup>

<sup>a</sup> *Institut de Ciència de Materials de Barcelona (ICMAB-CSIC), Campus UAB, 08193 Bellaterra, Spain.*

<sup>b</sup> *Shandong Provincial Key Laboratory of Monocrystalline Silicon Semiconductor Materials and Technology, College of Chemistry and Chemical Engineering, Dezhou University, Dezhou 253023, China.*

<sup>c</sup> *Catalan Institute of Nanoscience and Nanotechnology (ICN2), CSIC, and The Barcelona Institute of Science and Technology (BIST), Campus UAB, Bellaterra, Barcelona 08193, Spain.*

<sup>d</sup> *Departament de Química Inorgànica i Orgànica and Institut de Recerca de Química Teòrica i Computacional, Universitat de Barcelona, Diagonal 645, 08028 Barcelona, Spain.*

\*Emails: [jginerplanas@icmab.es](mailto:jginerplanas@icmab.es), [eliseo.ruiz@qi.ub.es](mailto:eliseo.ruiz@qi.ub.es)

### Supplementary Figures and Tables

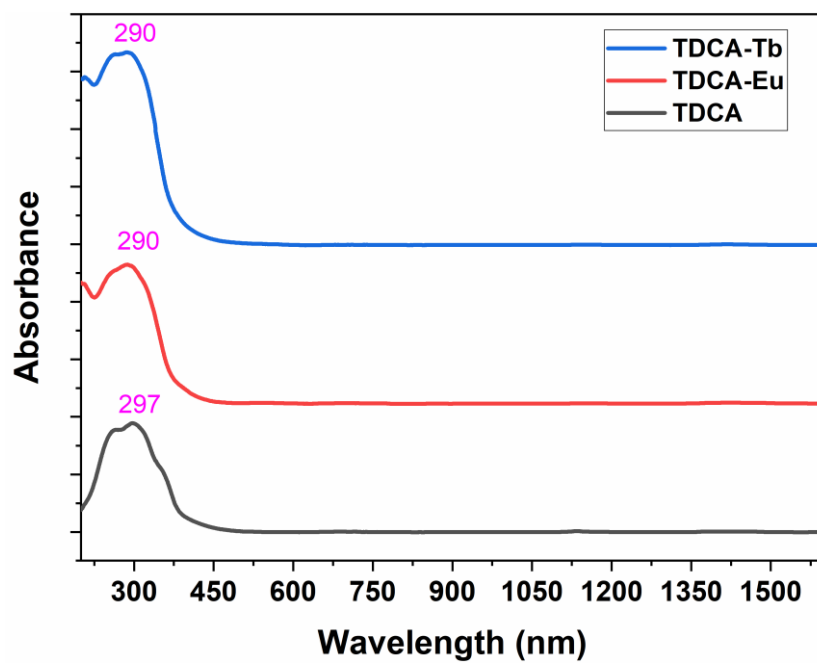

**Figure S1.** Solid state UV-vis spectra for TDCA and the corresponding Eu and Tb MOFs.

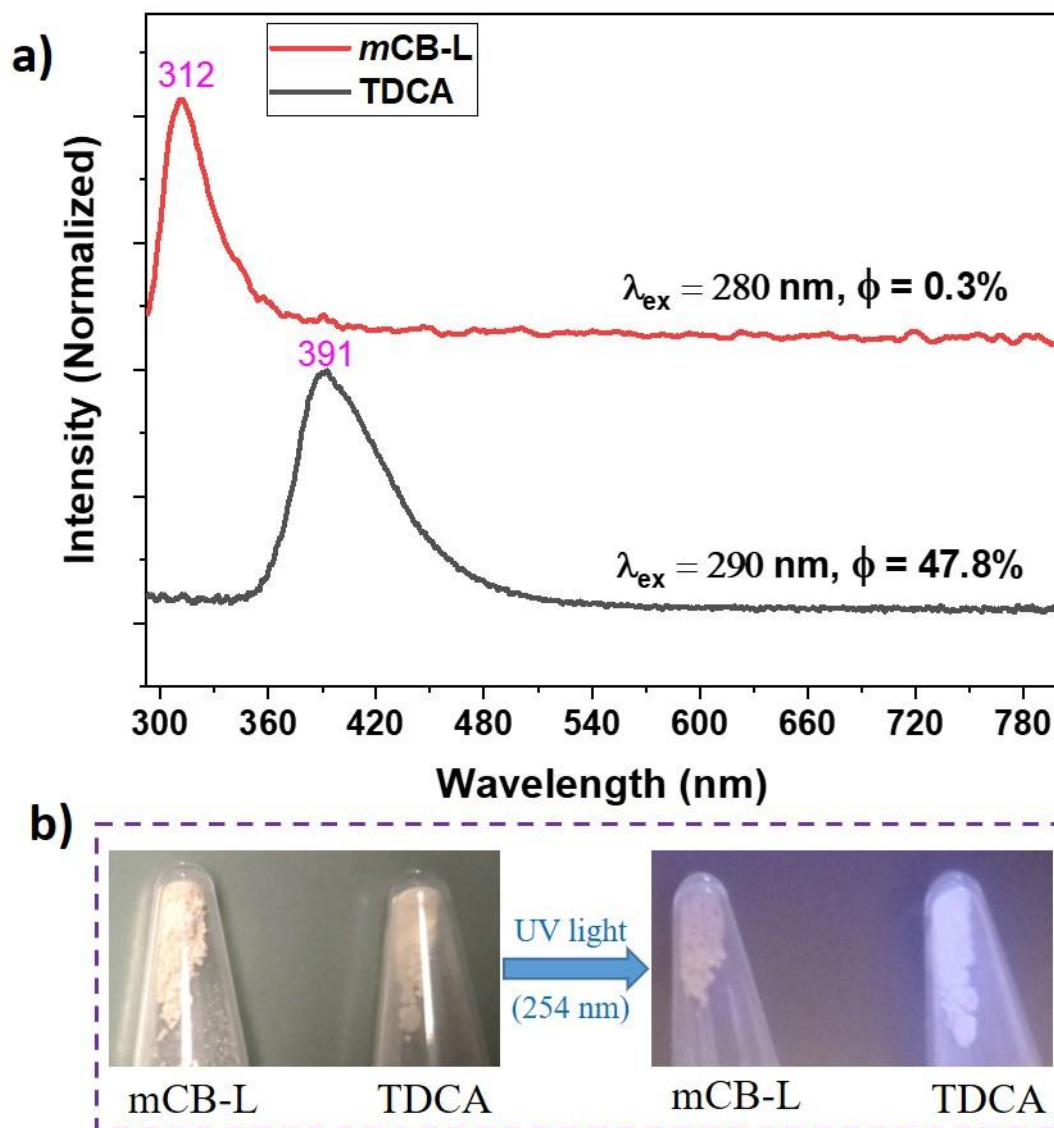

**Figure S2.** (a) Solid state luminescence spectra for TDCA and *mCB-L* ligand under continuous excitation at the indicated wavelengths; (b) optical images of the corresponding solids under daylight (left), and UV-light (254 nm, right).

**Table S1.** Calculated singlet-state energy differences ( $S_0-S_1$  and  $T_1-S_0$ ) for the four studied ligands (in nm and  $\text{cm}^{-1}$  in parenthesis) using some results at B3LYP TDDFT level from ref. 1 that corresponds to vertical excitations while STEOM-DLPNO-CCSD (see Computational details section) results are vertical (in blue) and adiabatic excitations (in red). For the two carborane systems, the  $S_0-S_1$  adiabatic excitations are larger than the corresponding vertical ones. The reason for this fact is that the geometries were optimized with a DFT method and the potential surfaces at DFT and coupled cluster are slightly different.

| ligand         | method                   | $S_0 - S_1$ | $T_1 - S_0$ |
|----------------|--------------------------|-------------|-------------|
| <i>m</i> CB-L  | B3LYP-TDDFT <sup>1</sup> | 260 (38461) | 489 (20449) |
|                | STEOM-DLPNO-CCSD         | 272 (36806) | 526 (19006) |
|                |                          | 241 (41437) | 424 (23593) |
| <i>m</i> CB-L2 | STEOM-DLPNO-CCSD         | 277 (36080) | 674 (14818) |
|                |                          | 215 (46511) | 670 (14932) |
| TDCA           | B3LYP-TDDFT <sup>1</sup> | 295 (33898) | 607 (16474) |
|                | STEOM-DLPNO-CCSD         | 280 (35727) | 614 (16300) |
|                |                          | 294 (34065) | 476 (20989) |
| QDCA           | STEOM-DLPNO-CCSD         | 281 (35583) | 685 (14586) |
|                |                          | 298 (33565) | 512 (19531) |

**Table S2.** Calculated total energies for the four studied ligands (in a.u., and state energy differences in comparison with  $S_0$  in nm and  $\text{cm}^{-1}$  in parenthesis) using STEOM-DLPNO-CCSD calculations. The optimized geometries for  $S_0$ ,  $S_1$ ,  $T_1$  states and the conical intersections (CI) were determined at B3LYP level. The  $S_0$  ( $T_1$  geom) value correspond to the ground state of the optimized structure for the  $T_1$  state.

| ligand        | state               | total energy    | energy differences |
|---------------|---------------------|-----------------|--------------------|
| <i>mCB-L</i>  | $S_0$               | -1168.960799832 | -                  |
|               | vertical $S_1$      | -1168.793094832 | 272 (36806)        |
|               | minimum $S_1$       | -1168.772000251 | 241 (41437)        |
|               | $T_1$               | -1168.853300111 | 424 (23593)        |
|               | $S_0$ ( $T_1$ geom) | -1168.939900111 |                    |
|               | CI                  | -1168.763812552 |                    |
| <i>mCB-L2</i> | $S_0$               | -1630.066756153 | -                  |
|               | vertical $S_1$      | -1629.902363153 | 277 (36080)        |
|               | adiabatic $S_1$     | -1629.854833486 | 215 (46511)        |
|               | $T_1$               | -1629.971344871 | 670 (14932)        |
|               | $S_0$ ( $T_1$ geom) | -1630.038860871 |                    |
| TDCA          | $S_0$               | -1069.464497967 | -                  |
|               | vertical $S_1$      | -1069.302360967 | 280 (35727)        |
|               | adiabatic $S_1$     | -1069.309286791 | 294 (34065)        |
|               | $T_1$               | -1069.368865172 | 476 (20989)        |
|               | $S_0$ ( $T_1$ geom) | -1069.443129172 |                    |
|               | CI                  | -1069.256727594 |                    |
| QDCA          | $S_0$               | -1530.586859917 | -                  |
|               | vertical $S_1$      | -1530.424733917 | 281 (35583)        |
|               | adiabatic $S_1$     | -1530.434024002 | 298 (33565)        |
|               | $T_1$               | -1530.497962180 | 512 (19531)        |
|               | $S_0$ ( $T_1$ geom) | -1530.564419180 |                    |

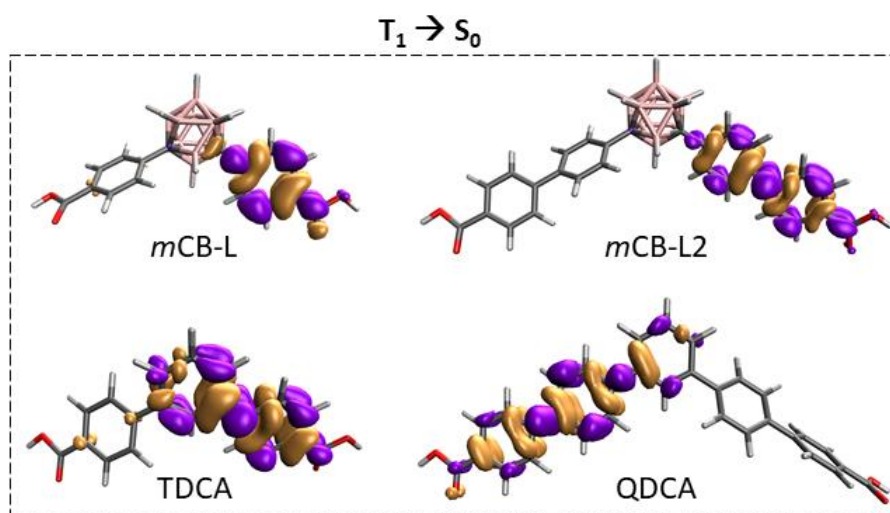

**Figure S3.** Schematic diagrams for the energy emission from triplet states ( $T_1$  to  $S_0$ ). Purple (negative values) and pale brown (positive values) lobes represent the electron density differences between the initial and final state calculated at STEOM-DLPNO-CCSD level.

The electron density difference maps corresponding the  $T_1 \rightarrow S_0$  de-excitations show that the electron density transferences occur within only one of the sides of the molecule for the four systems. As in the case of the singlet excitations (Fig. 2), the carborane moieties do not show any change in the electron density during the transfer.

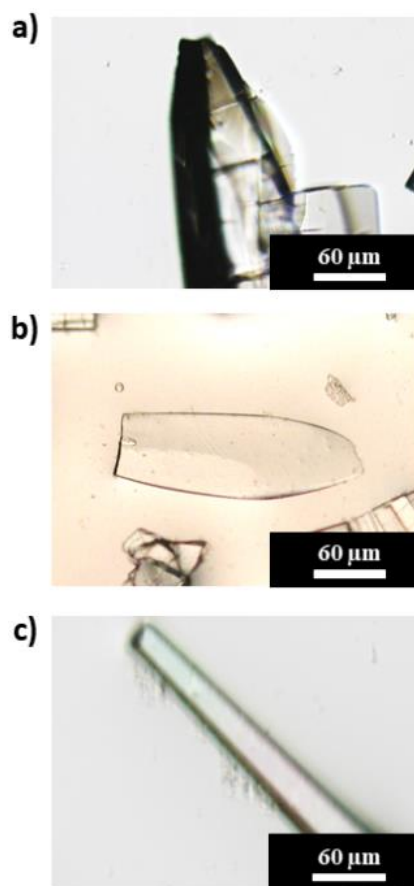

**Figure S4.** Optical images of the crystals for TDCA-Ce (a), TDCA-Eu (b) and TDCA-Tb (c).

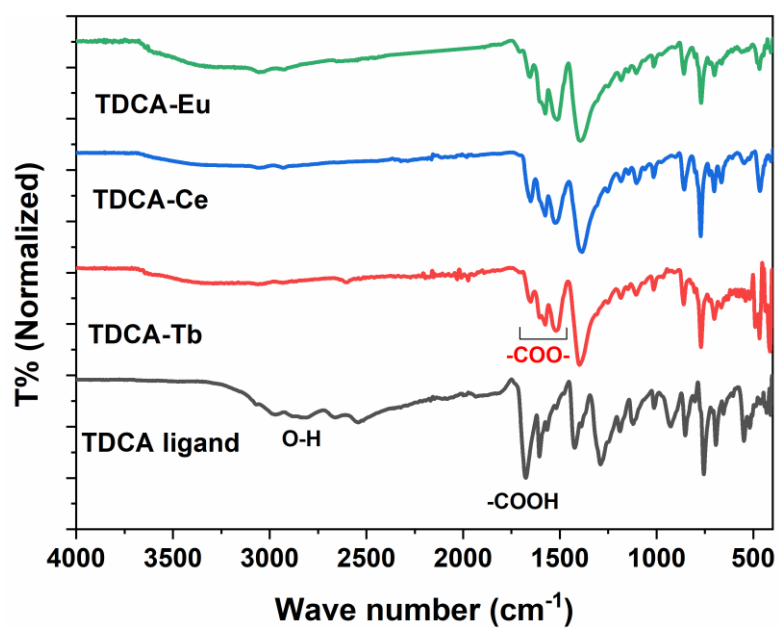

**Figure S5.** FTIR spectra for TDCA and their Eu, Ce and Tb MOFs.

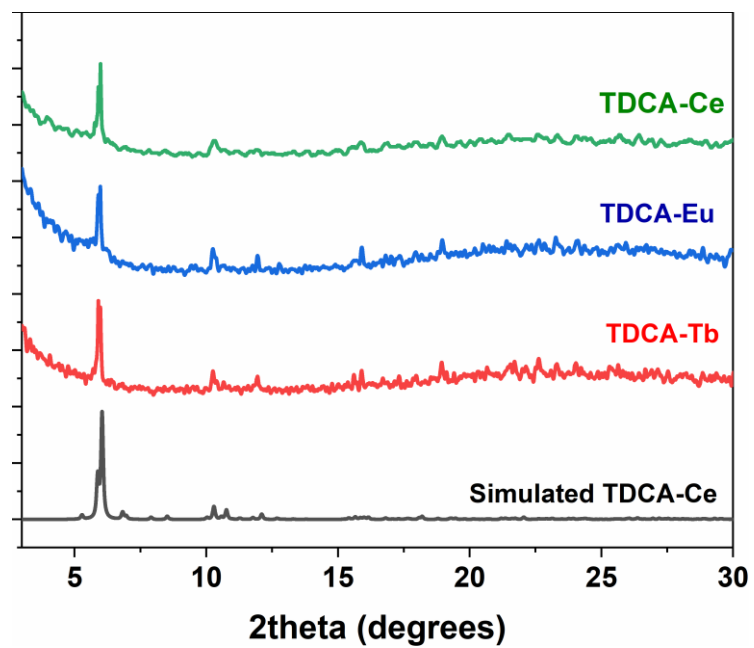

**Figure S6.** Experimental PXRD patterns of TDCA-Ce, TDCA-Eu and TDCA-Tb, and simulated PXRD pattern of TDCA-Ce.



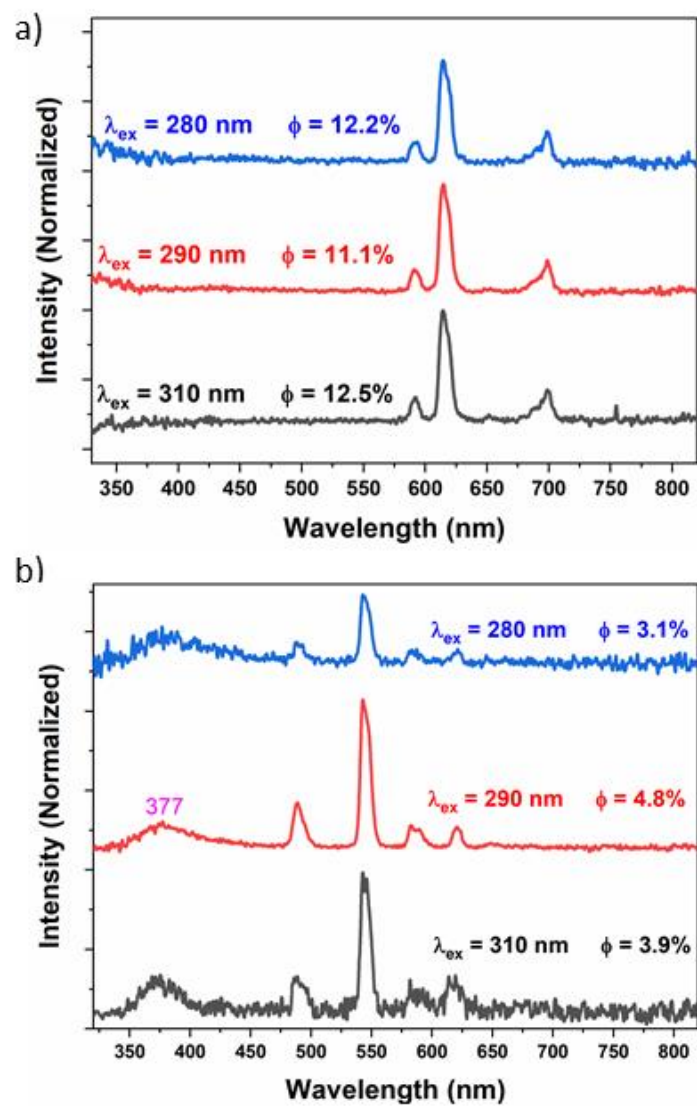

**Figure S7.** Solid-state emission spectra and quantum yields (QY) of TDCA-Eu (a) and TDCA-Tb (b) under continuous-wave irradiation at various  $\lambda_{ex}$  (indicated in each spectrum) at room temperature.

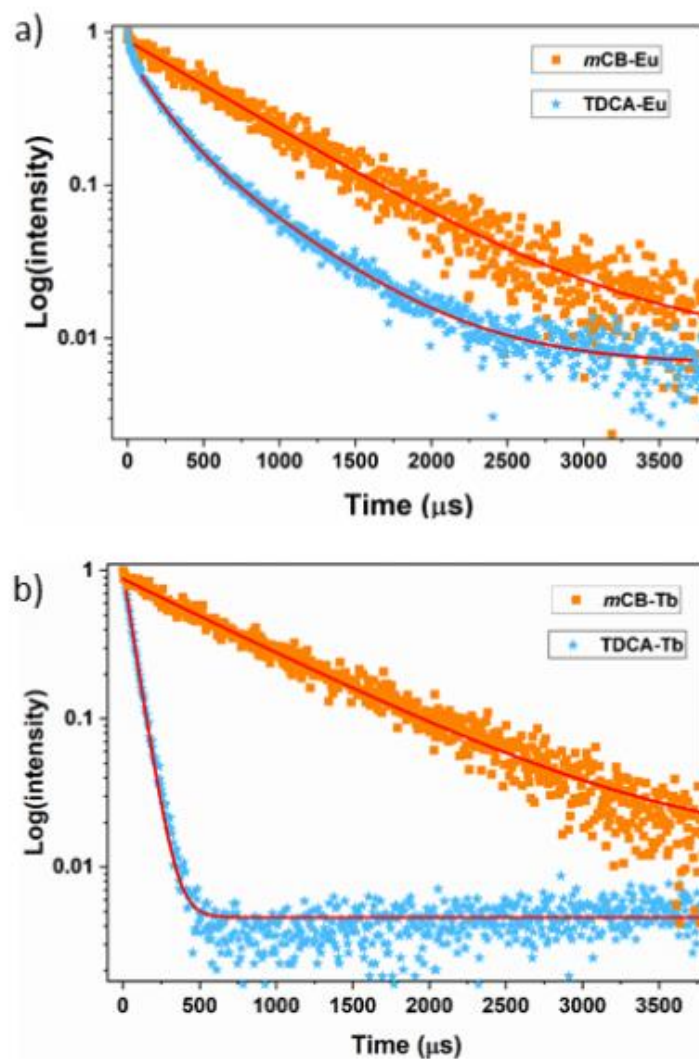

**Figure S8.** (a) Luminescence decays of Eu ( $\lambda_{em} = 614$  nm) in the different MOFs ( $\lambda_{ex} = 290$  nm); (b) Luminescence decays of Tb ( $\lambda_{em} = 541$  nm) in the different MOFs ( $\lambda_{ex} = 290$  nm).

## References

- 1 Z. Li, R. Núñez, M. E. Light, E. Ruiz, F. Teixidor, C. Viñas, D. Ruiz-Molina, C. Roscini and J. G. Planas, *Chem. Mater.*, 2022, **34**, 4795–4808.
